# Supplementary material for: Porous CaFe2O4 as a promising lithium ion battery anode: a trade-off between high capacity and long-term stability
Source: Royal Society of Chemistry journal article supplement (doi:10.1039/c8nr03840f), 2018-01-01
Supplement: c8nr03840f1.pdf [file c8nr03840f1.pdf]

## Supplementary Information

### **Porous $\text{CaFe}_2\text{O}_4$ as a promising lithium ion battery anode: a trade-off between high capacity and long-term stability**

Chunhua Han,\* Xiao Zhang, Xiaoming Xu, Qi Li, Qiu He, Jiashen Meng, Xuanpeng Wang, Ziang Liu, Peijie Wu and Liqiang Mai\*

Prof. C. Han, X. Zhang, Dr. X. Xu, Dr. Q. Li, Q. He, Dr. J. Meng, Dr. X. Wang, Dr. Z. Liu, P. Wu, Prof. L. Mai

State Key Laboratory of Advanced Technology for Materials Synthesis and Processing, International School of Materials Science and Engineering, Wuhan University of Technology, Luoshi Road 122, Wuhan, 430070, Hubei, China

\*E-mail: hch5927@whut.edu.cn (Prof. C. H. Han); mlq518@whut.edu.cn (Prof. L. Q. Mai)

‡These authors contributed equally to this work.

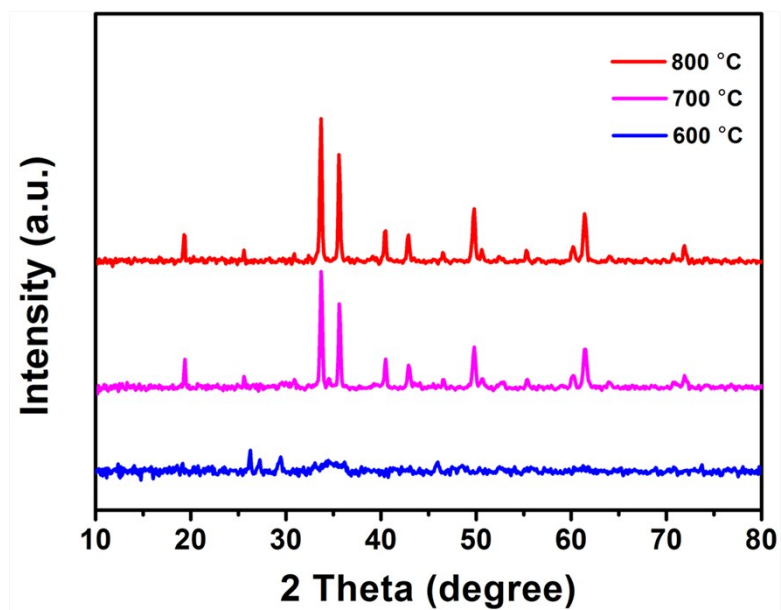

**Fig. S1** XRD patterns of the  $\text{CaFe}_2\text{O}_4$  calcined at different temperatures for 5 h in air.

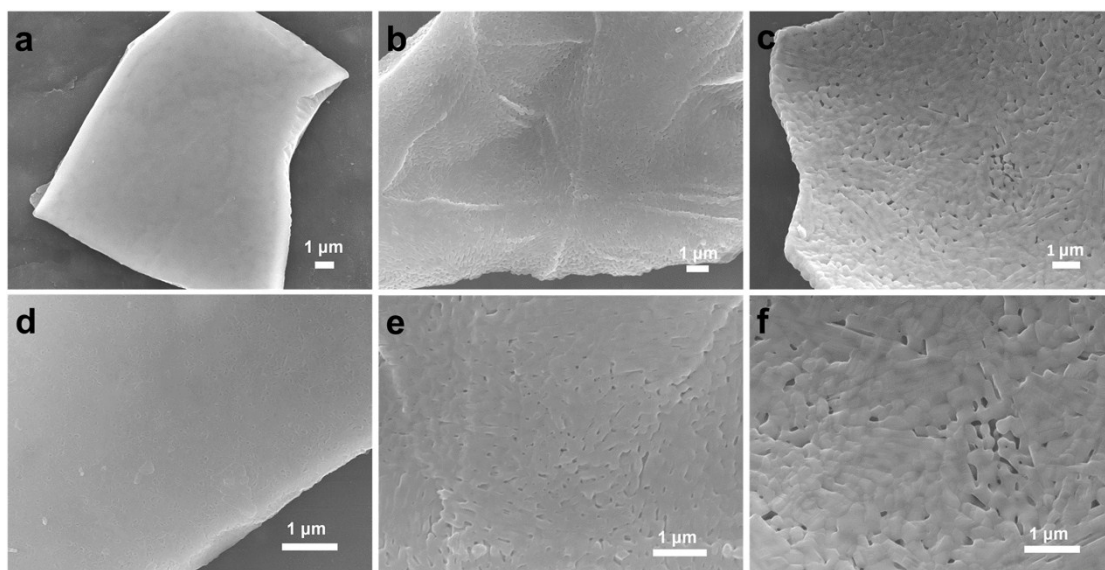

**Fig. S2** SEM images of the  $\text{CaFe}_2\text{O}_4$  calcined at 600 °C (a, d), 700 °C (b, e), 800 °C (c, f) for 5 h in air.

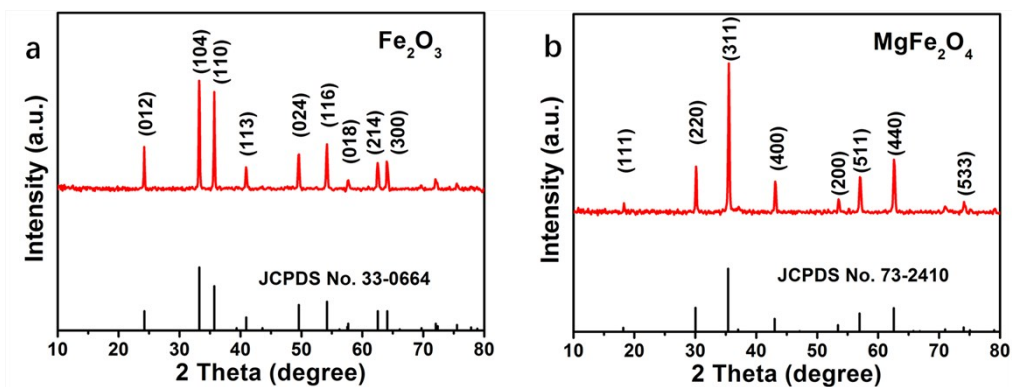

**Fig. S3** XRD patterns of the  $\text{Fe}_2\text{O}_3$  (a) and  $\text{MgFe}_2\text{O}_4$  (b) calcined at  $800\text{ }^\circ\text{C}$  for 5 h in air.

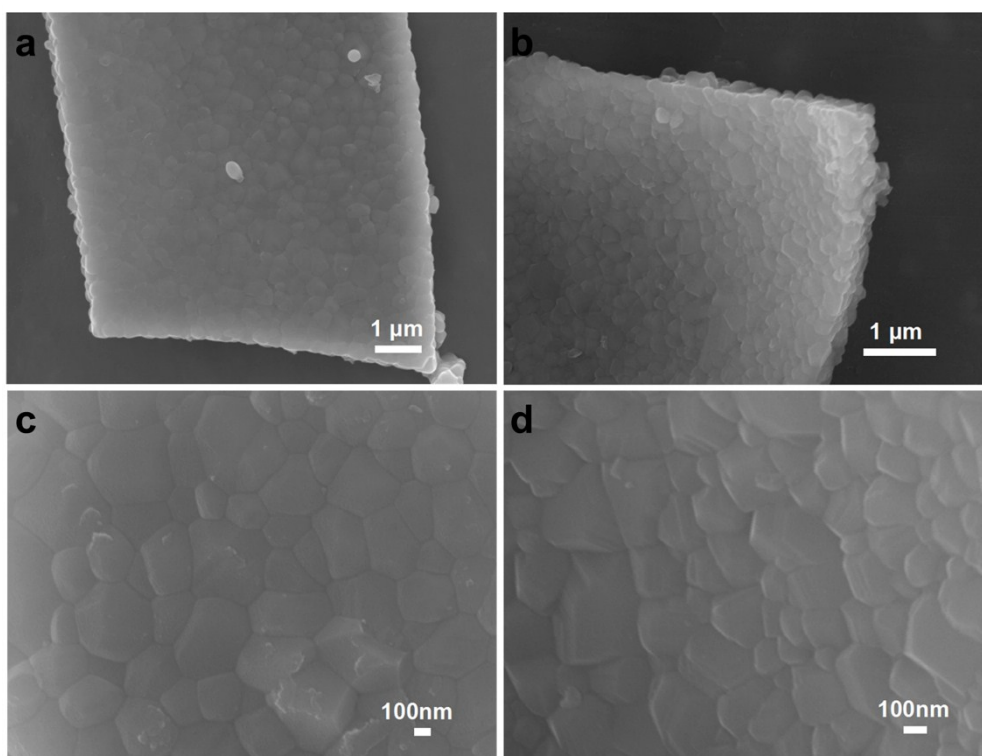

**Fig. S4** SEM images of the  $\text{Fe}_2\text{O}_3$  (a, c) and  $\text{MgFe}_2\text{O}_4$  (b, d) calcined at  $800\text{ }^\circ\text{C}$  for 5 h in air.

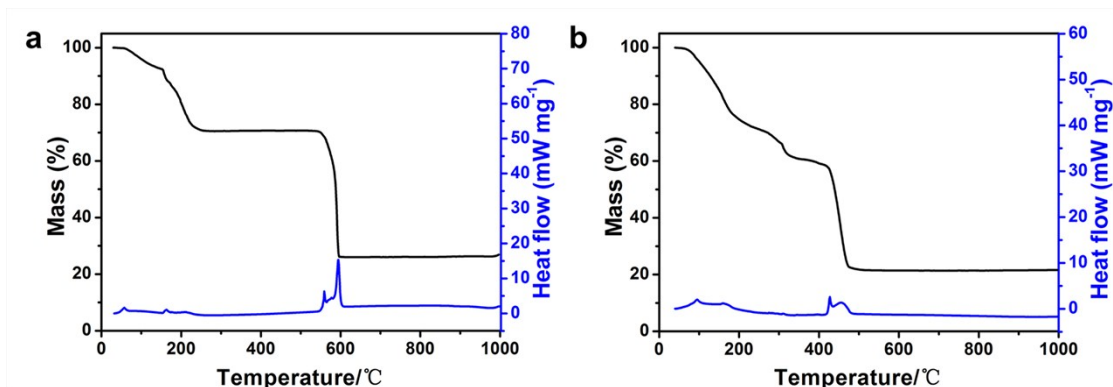

**Fig. S5** TGA and DSC curves of the commercial  $\text{Ca}(\text{NO}_3)_2 \cdot 4\text{H}_2\text{O}$  (a) and  $\text{Mg}(\text{NO}_3)_2 \cdot 6\text{H}_2\text{O}$  (b).

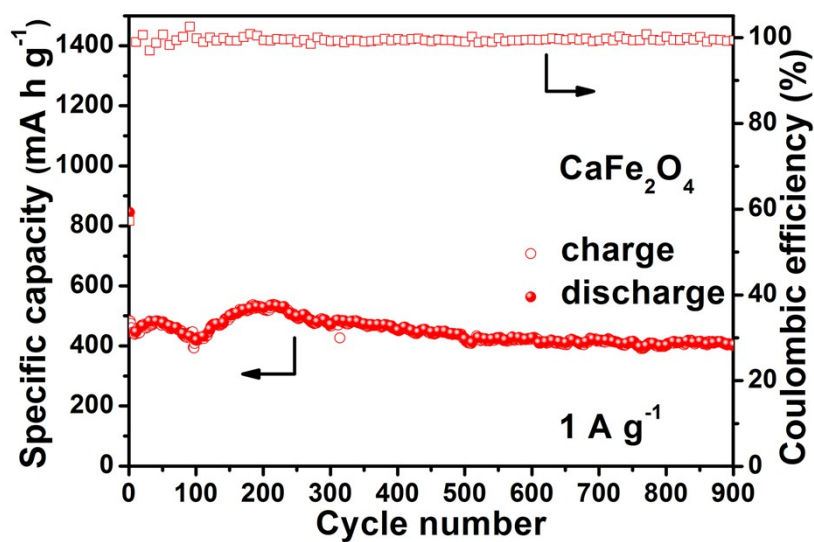

**Fig. S6** Cycling performance of the  $\text{CaFe}_2\text{O}_4$  calcined at 800 °C for 5 h tested at a current density of  $1 \text{ A g}^{-1}$ .

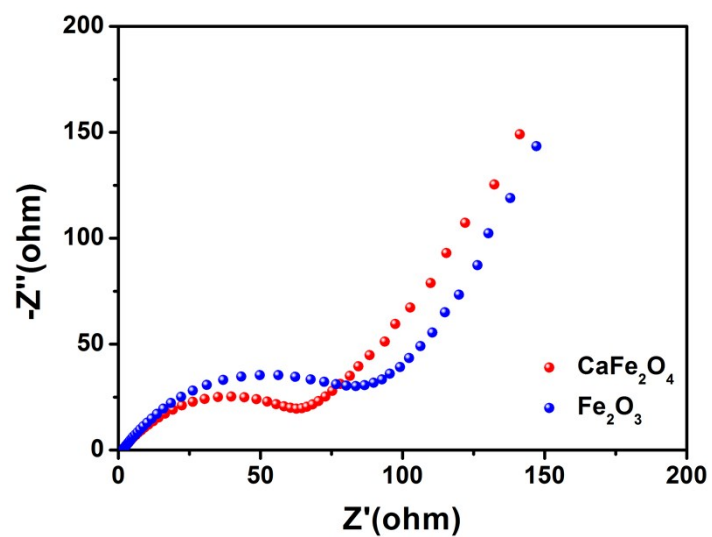

**Fig. S7** Nyquist plots of  $\text{CaFe}_2\text{O}_4$  and  $\text{Fe}_2\text{O}_3$  after 5 cycles.

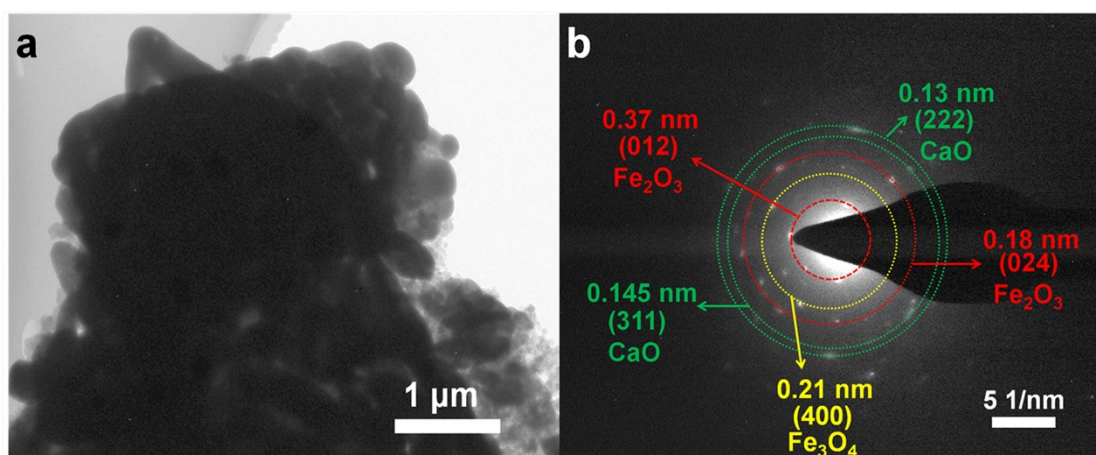

**Fig. S8** (a) TEM image, (b) SAED pattern of  $\text{CaFe}_2\text{O}_4$  at the delithiation state at  $0.5 \text{ A g}^{-1}$  after 5 cycles.

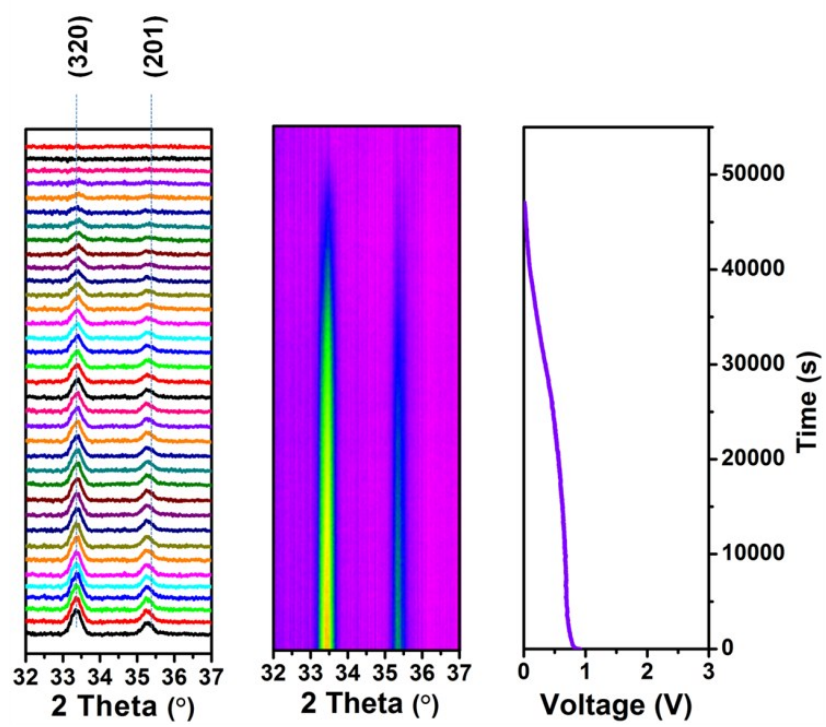

**Fig. S9** *In situ* XRD results of  $\text{CaFe}_2\text{O}_4$  during the initial discharge process.

**Tab. S1** Comparison of properties between the  $\text{CaFe}_2\text{O}_4$  (this work), graphite,  $\text{Fe}_2\text{O}_3$  and Silicon.

|                                                  | <b>Graphite</b> | <b><math>\text{CaFe}_2\text{O}_4</math></b> | <b><math>\text{Fe}_2\text{O}_3</math></b> | <b>Silicon</b>             |
|--------------------------------------------------|-----------------|---------------------------------------------|-------------------------------------------|----------------------------|
| Theoretical capacity<br>( $\text{mA h g}^{-1}$ ) | 372             | 770                                         | 1007                                      | 4200                       |
| Reaction mechanism                               | Insertion       | Conversion                                  | Conversion                                | Alloying                   |
| Density( $\text{g cm}^{-3}$ )                    | 2.25            | 4.8                                         | 5.26                                      | 2.34                       |
| Volume change                                    | ~10%            | <96%                                        | ~96%                                      | ~400%                      |
| Price                                            | Commercial      | Low preparation cost                        | Low preparation cost                      | High preparation cost      |
| Cycling performance without modification         | excellent       | excellent                                   | Significant capacity decay                | Significant capacity decay |

**Tab. S2** Electrochemical performance comparison of the porous  $\text{CaFe}_2\text{O}_4$  (this work) with various Fe-based anodes.

| Morphologies                                          | Voltage range (V) | Current density ( $\text{A g}^{-1}$ ) | Retained capacity ( $\text{mA h g}^{-1}$ ) | Reference |
|-------------------------------------------------------|-------------------|---------------------------------------|--------------------------------------------|-----------|
|                                                       |                   | 0.1                                   | 816 (100 cycles)                           |           |
| Porous $\text{CaFe}_2\text{O}_4$                      | 0.01-3            | 0.5                                   | 532 (1000 cycles)                          | Our work  |
|                                                       |                   | 1                                     | 404 (900 cycles)                           |           |
| Mesoporous $\text{Fe}_2\text{O}_3$                    | 0.05-3            | 0.1                                   | 1176 (200 cycles)                          | [1]       |
|                                                       |                   | 1                                     | 744 (500 cycles)                           |           |
| 3D net-like $\text{FeO}_x/\text{C}$                   | 0.01-3            | 0.2                                   | 851 (50 cycles)                            | [2]       |
|                                                       |                   | 1                                     | 714 (300 cycles)                           |           |
| $\alpha\text{-Fe}_2\text{O}_3$ void@frame microframes | 0.05-3            | 0.2                                   | 700 (550 cycles)                           | [3]       |
| porous $\alpha\text{-Fe}_2\text{O}_3$ nanorods        | 0.01-3            | 0.2                                   | 740 (300 cycles)                           | [4]       |
|                                                       |                   | 1                                     | 600 (300 cycles)                           |           |
| Core-Shell $\text{Fe}/\text{Fe}_2\text{O}_3$ Nanowire | 0.01-3            | 0.1                                   | 872 (100 cycles)                           | [5]       |
|                                                       |                   | 0.5                                   | 767 (200 cycles)                           |           |
| $\alpha\text{-Fe}_2\text{O}_3$                        | 0.01-3            | 0.1                                   | 617 (100 cycles)                           | [6]       |
|                                                       |                   | 0.1                                   | 968 (100 cycles)                           |           |
| Ultrathin $\text{Fe}_2\text{O}_3$ nanoflakes          | 0.05-3            | 0.1                                   | 1043 (100 cycles)                          | [7]       |
|                                                       |                   | 5                                     | 578 (500 cycles)                           |           |



## References

- [1] W. Guo, W. Sun, L.-P. Lv, S. Kong, Y. Wang, *ACS Nano*, 2017, 11, 4198-4205.
- [2] M. Li, H. Du, L. Kuai, K. Huang, Y. Xia, B. Geng, *Angew. Chem., Int. Ed.*, 2017, 129, 12823-12827.
- [3] J. Zhu, D. Deng, *J. Mater. Chem. A*, 2016, 4, 4425-4432.
- [4] Y. Zhu, Q. Wang, X. Zhao, B. Yuan, *RSC Adv.*, 2016, 6, 97385-97390.
- [5] Z. Na, G. Huang, F. Liang, D. Yin, L. Wang, *Chem.–Eur. J.*, 2016, 22, 12081-12087.
- [6] P. Santhoshkumar, K. Prasanna, Y.N. Jo, I.N. Sivagami, S.H. Kang, C.W. Lee, *J. Mater. Chem. A*, 2017, 5, 16712-16721.
- [7] Y. Wang, J. Han, X. Gu, S. Dimitrijević, Y. Hou, S. Zhang, *J. Mater. Chem. A*, 2017, 5, 18737-18743.
